# Supplementary material for: Always Look on the Bright Side of Life: Religiosity, Emotion Regulation and Well-Being in a Jewish and Christian Sample
Source: Springer Nature journal article supplement (doi:10.1007/s10902-017-9956-9), 2018-01-09
Supplement: MOESM1 [file 15352146]

**Online Appendix**

**Measure of Religiosity in Study 1**

What is your religion?

1. Jewish
2. Muslim
3. Christian
4. Other:______

People differ in their religious beliefs. To what extent do you believe in:

1. The existence of God?
2. Life after death?
3. The existence of Heaven?
4. The *Torah* is the word of God?
5. The distinction between good and badneeds to be based on divine law

Scale:

1. Not at all
2. Probably not
3. Probably
4. Absolutely

How frequently do you attend a house of worship (Church, Synagogue, Temple, or Mosque)?

1. Never or almost never
2. Less than once a year
3. Several time a year
4. About once a month
5. Almost every week
6. Once a week
7. Several times a week

How often do you take part in religious events, such as discussions, lectures, or visiting holy sites, not including attendance at your house of worship?

1. Never or almost never
2. Less than once a year
3. Several time a year
4. About once a month
5. Almost every week
6. Once a week
7. Several times a week

How many of your friends and acquaintances are religious?

1. None of my friends and acquaintances
2. Very few of my friends and acquaintances
3. Some of my friends and acquaintances
4. Many of my friends and acquaintances
5. All of my friends and acquaintances

How frequently do you refer to the people who share your religion as “us” rather than “them”?

Never

Infrequently

Sometimes

Frequently

Always

**Measure of Religiosity in Study 2**

What is your religion?

1. Roman Catholic
2. Protestant
3. Muslim
4. Buddhist
5. Hindu
6. Jewish
7. Other
8. None

People differ in their religious beliefs. To what extent do you believe in:

1. The existence of God?
2. The existence of heaven and hell?

Scale:

1. Not at all


5. absolutely

How frequently do you attend a house of worship (Church, Synagogue, Temple, or Mosque)?

1. Never or almost never
2. Less than once a year
3. Several time a year
4. About once a month
5. Almost every week
6. Once a week
7. Several times a week

How often do you take part in religious events, such as discussions, lectures, or visiting holy sites, not including attendance at your house of worship?

1. Never or almost never
2. Less than once a year
3. Several time a year
4. About once a month
5. Almost every week
6. Once a week
7. Several times a week

How many of your friends and acquaintances are religious?

1. None of my friends and acquaintances
2. Very few of my friends and acquaintances
3. Some of my friends and acquaintances
4. Many of my friends and acquaintances
5. All of my friends and acquaintances

How frequently do you refer to the people who share your religion as “us” rather than “them”?

Never

Infrequently

Sometimes

Frequently

Always

**Study 1 Results**

Table A4 presents the indirect effect of religiosity on life satisfaction, as well as its indirect effects (the product of their constituent paths, see MacKinnon, 2008) through one or more intermediary variables, its direct effect where specified, the totals of its indirect and overall effects for each of the three models, as well as bootstrapped standard errors (see Table A1 for full path coefficients).

Starting with Model Ia, religiosity had a significant (positive) total effect on life satisfaction; 70% of this total effect represents the total indirect effects of religion through reappraisal and affect, while 30% represents its remaining direct effect. Two of the four specified mediation paths yield statistical significance. First, and as hypothesized, religiosity was associated with life satisfaction through increased cognitive reappraisal, and then through greater positive affect, as indicated by the significant three-path mediation effect. In addition, the effect of religiosity on life satisfaction was also mediated by positive affect. Negative affect, on the other hand, did not mediate the effect of religiosity or reappraisal on life satisfaction.

Next, results from Model Ia indicate that the path coefficient for the direct effect of religiosity on life satisfaction is statistically insignificant (*p*=.207), suggesting that all of the effect of religiosity on life satisfaction in our model is accounted for by the mediation with reappraisal and affect. Thus, we re-estimated the structural equation model when removing this direct effect (Model IIa, panel II in Figure A1). Results remained intact, with some improvement in model fit, indicated by a lower BIC fit index. Still, the LR test indicates that this improvement is not statistically significant.

For comparison, we estimated a model whereby the effect of religiosity on life satisfaction in its entirety is doubly mediated by reappraisal frequency and by affect, removing the mediation paths of religion through affect (Model IIIa, panel III in Figure A1). The LR test indicated that the fit for model II was significantly superior to the fit of model III. Additional fit statistics point to the same conclusion, with Model II displaying a higher RMSEA, lower CFI, and insignificant χ2.

**Study 2 Results**

Table A5 presents the total and indirect effects of religiosity on life satisfaction using the bias-corrected bootstrap approach, as well as the fit indices, for each of the three models. For full path coefficients from these models, see Table A3.

As expected, religiosity had a significant positive total effect on life satisfaction, of which 75% pertains to its total indirect effects through reappraisal and affect (see Model I). As in the Jewish sample, results from Model Ia indicated that the path coefficient for the direct effect of religiosity on life satisfaction was statistically insignificant (*p*=.252). The structural equation model when removing this direct effect (Model IIa, see Panel II in Figure A1) exhibited some improvement in model fit, which is indicated by a lower BIC fit statistic. Still, the LR test indicated that this improvement is not statistically significant.

In both specifications, and as hypothesized, religiosity was associated with greater life satisfaction through more frequent use of cognitive reappraisal, and then through increased positive affect, as indicated by the statistically significant three-path mediation effect. As in the Jewish sample, the effect of religiosity on life satisfaction was also mediated by positive affect independently of reappraisal. Whereas in the Jewish sample, cognitive reappraisal mediated the link between religiosity and positive, but not negative affect, in the Christian sample, cognitive reappraisal mediated the link between religiosity and positive, as well as negative, affect. These results hold when removing the direct effect of religiosity on affect (Model IIIa, panel III in Figure A1), although this specification yields a significantly worse fit to the data, as indicated by the fit indices as well as the statistically significant LR test. As in Study 1, these results support the hypothesis that cognitive reappraisal mediated the link between religiosity and affective experiences, which in turn, are linked to life satisfaction.

*Expressive suppression*

We specified the structural equation models presented in Figure A1 (Panels I-III) when substituting reappraisal for suppression, as well as a model including a three-path mediated effect for both emotion regulation strategies (reappraisal and suppression; see Panel IV in Figure A1). Contrary to the Jewish sample, results indicated that the three-path mediation effect of religiosity on life satisfaction is carried out both by reappraisal and by suppression, as indicated by the statistically significant indirect effects in Table A5 (Models I-IIIb). Thus, religiosity is associated with less frequent use of suppression, which in turn increases positive affect and life satisfaction. The statistically significant effect of suppression through positive (but not negative) affect is robust to the model specification, and holds when specifying both emotion regulation mechanisms as potential mediators for the effect of religiosity (see Model IV in Table A5 and Panel IV in Figure A1).

*Figure A1.*Diagrams of the Three-Path Mediated Effect Models

**
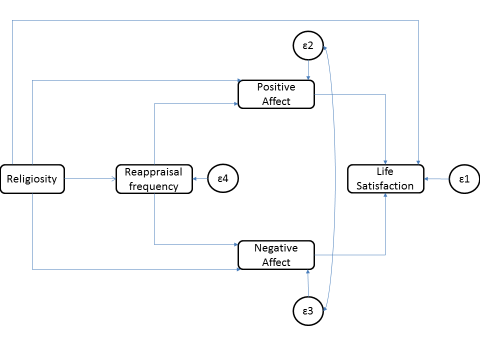
**

*Model I*. A model with direct effects from religiosity on reappraisal, positive affect, negative affect, and life satisfaction.

**
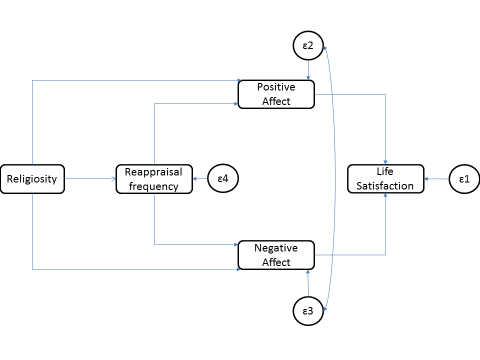
**

*Model II*. A model with direct effects from religiosity on reappraisal, positive affect, negative affect, but not life satisfaction.

**
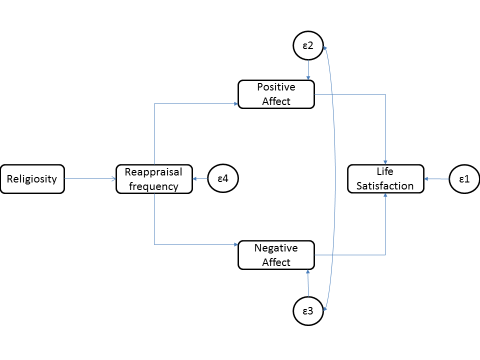
**

*Model III*. A model with direct effects from religiosity on reappraisal, but not positive affect, negative affect, or life satisfaction.

*
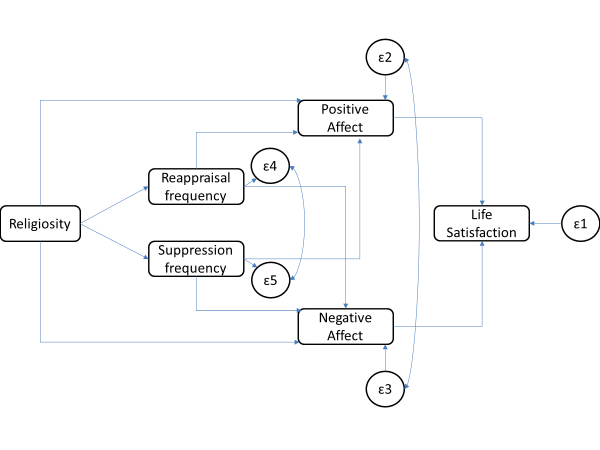
*

*Model IV*. A model with both reappraisal and suppression as mediators between religiosity and positive and negative affect.

Table A1

*The three-path mediation models – Israeli Jewish sample (Study 1*)

|  | **Model Ia** | **Model IIa** | **Model IIIa** | | **Model Ib** | | **Model IIb** | | **Model IIIb** | | **Model IV** | |
| --- | --- | --- | --- | --- | --- | --- | --- | --- | --- | --- | --- | --- |
| Reappraisal -> Religiosity | .226 (.056)* | .226 (.056)* | .226 (.056)* | | - | | - | | - | | .226 (.056)* | |
| 95% CI | [.117, .336] | [.117, .336] | [.117, .336] | |  | |  | |  | | [.117, .336] | |
| Suppression -> Religiosity | - | - | - | | .103 (.058) | | .103 (.058) | | .103 (.058) | | .103 (.058) | |
| 95% CI |  |  |  | | [-.011, .217] | | [-.011, .217] | | [-.011, .217] | | [-.011, .217] | |
| Positive affect -> Reappraisal | .313 (.053)* | .313 (.053)* | .350 (.052)* | | - | | - | | - | | .327 (.053)* | |
| 95% CI | [.208, .417] | [.208, .417] | [.249, .451] | |  | |  | |  | | [.223, .432] | |
| Positive affect -> Suppression | - | - | - | | -.055 (.057) | | -.055 (.057) | | -.030 (.059) | | -.100 (.055) | |
| 95% CI |  |  |  | | [-.167, .058] | | [-.167, .058] | | [-.145, .086] | | [-.207, .008] | |
| Positive affect -> Religiosity | .164 (.055)* | .164 (.055)* | - | | .240 (.056)* | | .240 (.056)* | | - | | .171 (.055)* | |
| 95% CI | [.056, .272] | [..056, .272] |  | | [.131, .350] | | [.131, .350] | |  | | [.063, .279] | |
| Negative affect -> Reappraisal | -.087 (.060) | -.087 (.060) | -.101 (.058) | | - | | - | | - | | -.112 (.059)* | |
| 95% CI | [-.204, .030] | [-.204, .030] | [-.216, .013] | |  | |  | |  | | [-.228, .005] | |
| Negative affect -> Suppression | - | - | - | | .158 (.058)* | | .158 (.058)* | | .148 (.058)* | | .174 (.058)* | |
| 95% CI |  |  |  | | [.046, .271] | | [.046, .271] | | [.035, .261] | | [.061, .287] | |
| Negative affect -> Religiosity | -.063 (.060) | -.063 (.060) | - | | -.099 (.058) | | -.099 (.058) | | - | | -.076 (.059) | |
| 95% CI | [-.181, .054] | [-.181, .054] |  | | [-.213, .014] | | [-.213, .014] | |  | | [-.192, .04] | |
| Life satisfaction -> Positive affect | .571 (.046)* | .586 (.044)* | .586 (.044)* | | .571 (.046)* | | .586 (.044)* | | .586 (.044)* | | .586 (.044)* | |
| 95% CI | [.481, .661] | [.500, .673] | [.500, .673] | | [.481, .661] | | [.500, .673] | | [.500, .673] | | [.500, .673] | |
| Life satisfaction -> Negative affect | -.089 (.051) | -.087 (.051) | -.087 (.051) | | -.089 (.051) | | -.087 (.051) | | -.087 (.051) | | -.087 (.051) | |
| 95% CI | [-.189, .012] | [-.187, .014] | [-.187, .014] | | [-.189, .012] | | [-.187, .014] | | [-.187, .014] | | [-.187, .014] | |
| Life satisfaction -> Religiosity | .060 (.047) | - | - | | .060 (.047) | | - | | - | | - | |
| 95% CI | [-.032, .152] |  |  | | [-.032, .152] | |  | |  | |  | |
| Positive affect <-> Negative affect | -.455 (.047)* | -.455 (.047)* | -.458 (.047)* | | -.454 (.047)* | | -.454 (.047)* | | -.463 (.046)* | | -.446 (.047)* | |
| 95% CI | [-.546, -.363] | [-.546, -.363] | [-.549, -.366] | | [-.546, -.363] | | [-.546, -.363] | | [-.554, -.372] | | [-.538, -.353] | |
| Reappraisal <-> Suppression | - | - |  | | - | | - | | - | | .141 (.058)* | |
| 95% CI |  |  |  | |  | |  | |  | | [.027, .254] | |
| *Intercepts* |  |  |  | |  | |  | |  | |  | |
| Reappraisal | 4.553 (.279)* | 4.553 (.279)* | 4.553 (.279)* | | - | | - | | - | | 4.553 (.279)* | |
| 95% CI | [4.007, 5.100] | [4.007, 5.100] | [4.007, 5.100] | |  | |  | |  | | [4.007, 5.100] | |
| Suppression | - | - | - | | 2.867 (.212)* | | 2.867 (.212)* | | 2.867 (.212)* | | 2.867 (.212)* | |
| 95% CI |  |  |  | | [2.451, 3.283] | | [2.451, 3.283] | | [2.452, 3.283] | | [2.451, 3.283] | |
| Positive affect | 2.864 (.368)* | 2.864 (.368)* | 3.090 (.365)* | | 4.445 (.314)* | | 4.445 (.314)* | | 4.977 (.278)* | | 3.084 (.387)* | |
| 95% CI | [2.143, 3.584] | [2.143, 3.584] | [2.374, 3.806] | | [3.829, 5.060] | | [3.829, 5.060] | | [4.433, 5.522] | | [2.327, 3.842] | |
| Negative affect | 3.097 (.323)* | 3.097 (.323)* | 3.010 (.314)* | | 2.247 (.256)* | | 2.247 (.256)* | | 2.027 (.224)* | | 2.712 (.351)* | |
| 95% CI | [2.465, 3.730] | [2.465, 3.730] | [2.394, 3.626] | | [1.746, 2.748] | | [1.746, 2.748] | | [1.588, 2.466] | | [2.025, 3.399] | |
| Life satisfaction | 1.394 (.366)* | 1.468 (.363)* | 1.468 (.363)* | | 1.394 (.366)* | | 1.468 (.363)* | | 1.468 (.363)* | | 1.468 (.363)* | |
| 95% CI | [.677, 2.110] | [.757, 2.180] | [.757, 2.180] | | [.677, 2.110] | | [.757, 2.180] | | [.757, 2.180] | | [.757, 2.180] | |
| *Residual variances* |  |  |  | |  | |  | |  | |  | |
| Reappraisal | .949 (.025)* | .949 (.025)* | .949 (.025)* | | - | | - | | - | | .949 (.025)* | |
| 95% CI | [.899, .998] | [.899, .998] | [.899, .998] | |  | |  | |  | | [.899, .998] | |
| Suppression | - | - | - | | .989 (.012)* | | .989 (.012)* | | .989 (.012)* | | .989 (.012)* | |
| 95% CI |  |  |  | | [.966, 1.013] | | [.966, 1.013] | | [.966, 1.013] | | [.966, 1.013] | |
| Positive affect | .852 (.039)* | .852 (.039)* | .878 (.036)* | | .942 (.027)* | | .942 (.027)* | | .999 (.004)* | | .842 (.039)* | |
| 95% CI | [.776, .928] | [.776, .928] | [.807, .948] | | [.890, .994] | | [.890, .994] | | [.992, 1.006] | | [.765, .920] | |
| Negative affect | .986 (.014)* | .986 (.014)* | .990 (.012)* | | .968 (.020)* | | .968 (.020)* | | .978 (.017)* | | .957 (.023)* | |
| 95% CI | [.959, 1.013] | [.959, 1.013] | [.967, 1.013] | | [.928, 1.008] | | [.928, 1.008] | | [.945, 1.012] | | [.911, 1.003] | |
| Life satisfaction | .598 (.045)* | .602 (.045)* | .602 (.045)* | | .598 (.045)* | | .602 (.045)* | | .602 (.045)* | | .602 (.045)* | |
| 95% CI | [.511, .686] | [.514, .689] | [.514, .689] | | [.511, .686] | | [.514, .689] | | [.514, .689] | | [.514, .689] | |
| *Goodness of fit* |  |  |  | |  | |  | |  | |  | |
| CFI | .999 | .997 | .973 | | .995 | | .992 | | .928 | | .994 | |
| TLI | .994 | .986 | .932 | | .946 | | .960 | | .821 | | .972 | |
| RMSEA | .023 | .037 | .080 | | .066 | | .058 | | .121 | | .043 | |
| SRMR | .010 | .017 | .052 | | .015 | | .021 | | .075 | | .021 | |
| χ2fit | 1.150 n.s. | 2.786 n.s. | 11.379* | | 2.272 n.s. | | 3.908 n.s. | | 20.921* | | 4.626 n.s. | |
| χ2baseline | 281.060* | 281.060* | 281.060* | | 246.370* | | 246.370* | | 246.370* | | 300.706 | |
| BIC | 2898.975 | 2894.948 | 2892.216 | | 3073.725 | | 3069.698 | | 3075.385 | | 3870.625 | |
| -2LL |  | I:IIa=1.636, ns | | II:IIIa=8.594* | |  | | I:IIb=1.636, ns | | II:IIIb=17.014* | |  |
| N | 288 | 288 | 288 | | 288 | | 288 | | 288 | | 288 | |

*Note.* Table entries are indirect and total effects of religiosity on life satisfaction, with bootstrapped standard errors in brackets (5000 bootstrap samples). * The 95% confidence interval of the effect based on 5,000 bootstrap samples does not include zero (as per the bias-corrected bootstrap approach).

Table A2

*SEM with latent variables, indirect and total effects*

|  | **Israeli Jewish sample** | | | **American-Christian sample** | | |
| --- | --- | --- | --- | --- | --- | --- |
|  | **Model I** | **Model II** | **Model III** | **Model I** | **Model II** | **Model III** |
| *Specific indirect effects* |  |  |  |  |  |  |
| Religiosity->PA-> Life satisfaction | .099 (.043)* | .112 (.046)* | - | .080 (.028)* | .081 (.028)* | - |
| 95% CI | [.007, .122] | [.022, .201] |  | [.025, .136] | [.025, .137] |  |
| Religiosity -> Reappraisal -> Positive affect -> Life satisfaction | .057 (.019)* | .060 (.020)* | .068 (.022)* | .033 (.014)* | .033 (.014)* | .040 (.015)* |
| 95% CI | [.009, .064] | [.020, .099] | [.024, .112] | [.005, .060] | [.005, .061] | [.010, .070] |
| Religiosity -> Negative affect -> Life satisfaction | .003 (.005) | .002 (.005) | - | .027 (.022) | .026 (.022) | - |
| 95% CI | [-.005, .009] | [-.007, .011] |  | [-.016, .069] | [-.016, .068] |  |
| Religiosity -> Reappraisal -> Negative affect -> Life satisfaction | .002 (.003) | .002 (.003) | .002 (.003) | .019 (.009)* | 019 (.009)* | .022 (.009)* |
| 95% CI | [-.002, .005] | [-.004, .007] | [-.004, .008] | [.002, .036] | [.002, .036] | [.004, .041] |
| *Sum of indirect effects (total indirect)* | .161 (.046)* | .176 (.048)* | .070 (.023)* | .159 (.044)* | .159 (.045)* | .062 (.023)* |
| 95% CI | [.038, .170] | [.081, .271] | [.026, .114] | [.073, .246] | [.070, .247] | [.017, .107] |
| *Direct effect* *of religiosity* | .100 (.056) | - | - | .018 (.053) | - | - |
| 95% CI | [-.006, .135] |  |  | [-.085, .122] |  |  |
| *Total effect of religiosity* | .262 (.065)* | . 176 (.048)* | .070 (.023)* | .177 (.070)* | .159 (.045)* | .062 (.023)* |
| 95% CI | [.080, .259] | [.081, .271] | [.026, .114] | [.041, .314] | [.070, .247] | [.017, .107] |
| *Goodness of fit* |  |  |  |  |  |  |
| CFI | .955 | .955 | .954 | .948 | .948 | .947 |
| RMSEA | .045 | .045 | .046 | .053 | .053 | .054 |
| SRMR | .050 | .051 | .062 | .052 | .052 | .066 |
| χ2fit | 690.003* | 693.041* | 699.602* | 738.411* | 738.531* | 747.492* |
| BIC | 24037.274 | 24034.649 | 24029.884 | 28812.751 | 28807.247 | 28804.959 |
| N | 288 | 288 | 288 | 277 | 277 | 277 |
|  |  |  |  |  |  |  |

*Note.* Table entries are standardized regression weights, robust standard errors in brackets. *p<.05. Factor loadings and the complete correlation matrix for all items are available from the authors.

Table A3

*The three-path mediation models – American Christian sample* (*Study 2*)

|  | **Model Ia** | **Model IIa** | **Model IIIa** | **Model Ib** | **Model IIb** | **Model IIIb** | **Model IV** |
| --- | --- | --- | --- | --- | --- | --- | --- |
| Reappraisal -> Religiosity | .133 (.059)* | .133 (.059)* | .133 (.059)* | - | - | - | .133 (.059)* |
| 95% CI | [.018, .249] | [.018, .249] | [.018, .249] |  |  |  | [.018, .249] |
| Suppression -> Religiosity | - | - | - | -.187 (.058)* | -.187 (.058)* | -.187 (.058)* | -.187 (.058)* |
| 95% CI |  |  |  | [-.301, -.074] | [-.301, -.074] | [-.301, -.074] | [-.301, -.074] |
| Positive affect -> Reappraisal | .340 (.052)* | .340 (.052)* | .370 (.052)* | - | - | - | .338 (.050)* |
| 95% CI | [.239, .442] | [.239, .442] | [.268, .472] |  |  |  | [.240, .436] |
| Positive affect -> Suppression | - | - | - | -.243 (.056)* | -.243 (.056)* | -.285 (.055)* | -.240 (.052)* |
| 95% CI |  |  |  | [-.352, -.134] | [-.352, -.134] | [-.393, -.177] | [-.342, -.138] |
| Positive affect -> Religiosity | .224 (.054)* | .224 (.054)* | - | .224 (.056)* | .224 (.056)* | - | .179 (.053)* |
| 95% CI | [.119, .329] | [.119, .329] |  | [.114, .333] | [.114, .333] |  | [.075, .283] |
| Negative affect -> Reappraisal | -.328 (.054)* | -.328 (.054)* | -.336 (.053)* | - | - | - | -.327 (.054)* |
| 95% CI | [-.433, -.222] | [-.433, -.222] | [-.441, -.232] |  |  |  | [-.432, -.222] |
| Negative affect -> Suppression | - | - | - | .078 (.060) | .078 (.060) | .095 (.060) | .075 (.057) |
| 95% CI |  |  |  | [-.040, .197] | [-.040, .197] | [-.021, .212] | [-.037, .187] |
| Negative affect -> Religiosity | -.063 (.057) | -.063 (.057) | - | -.092 (.060) | -.092 (.060) | - | -.049 (.058) |
| 95% CI | [-.174, .049] | [-.174, .049] |  | [-.210, .027] | [-.210, .027] |  | [-.162, .064] |
| Life satisfaction -> Positive affect | .464 (.047)* | .479 (.045)* | .479 (.045)* | .464 (.047)* | .479 (.045)* | .479 (.045)* | .479 (.045)* |
| 95% CI | [.372, .556] | [.390, .567] | [.390, .567] | [.372, .556] | [.390, .567] | [.390, .567] | [.390, .567] |
| Life satisfaction -> Negative affect | -.294 (.048)* | -.294 (.048)* | -.294 (.048)* | -.294 (.048)* | -.294 (.048)* | -.294 (.048)* | -.294 (.048)* |
| 95% CI | [-.389, -.200] | [-.389, -.200] | [-.389, -.200] | [-.389, -.200] | [-.389, -.200] | [-.389, -.200] | [-.389, -.200] |
| Life satisfaction -> Religiosity | .054 (.047) | - | - | .054 (.047) | - | - | - |
| 95% CI | [-.039, .146] |  |  | [-.039, .146] |  |  |  |
| Positive affect <-> Negative affect | -.299 (.055)* | -.299 (.055)* | -.306 (.054)* | -.373 (.052)* | -.373 (.052)* | -.382 (.051)* | -.290 (.055)* |
| 95% CI | [-.407, -.192] | [-.407, -.192] | [-.413, -.199] | [-.474, -.272] | [-.474, -.272] | [-.483, -.282] | [-.398, -.182] |
| Reappraisal <-> Suppression | - | - | - | - | - | - | -.010 (.060) |
| 95% CI |  |  |  |  |  |  | [-.128, .108] |
| *Intercepts* |  |  |  |  |  |  |  |
| Reappraisal | 4.998 (.243)* | 4.999 (.243)* | 4.999 (.243)* | - | - | - | 4.999 (.243)* |
| 95% CI | [4.522, 5.475] | [4.522, 5.475] | [4.522, 5.475] |  |  |  | [4.522, 5.475] |
| Suppression | - | - | - | 3.258 (.150)* | 3.258 (.150)* | 3.258 (.150)* | 3.258 (.150)* |
| 95% CI |  |  |  | [2.964, 3.552] | [2.964, 3.552] | [2.964, 3.552] | [2.964, 3.552] |
| Positive affect | 1.335 (.317)* | 1.335 (.317)* | 1.445 (.327)* | 3.828 (.239)* | 3.828 (.239)* | 4.218 (.204)* | 2.128 (.360)* |
| 95% CI | [.713, 1.957] | [.713, 1.957] | [.804, 2.085] | [3.360, 4.296] | [3.360, 4.296] | [3.817, 4.619] | [1.423, 2.834] |
| Negative affect | 3.735 (.268)* | 3.735 (.268)* | 3.704 (.268)* | 1.842 (.235)* | 1.842 (.235)* | 1.682 (.213)* | 3.487 (.335)* |
| 95% CI | [3.209, 4.260] | [3.209, 4.260] | [3.178, 4.230] | [1.381, 2.303] | [1.381, 2.303] | [1.265, 2.098] | [2.830, 4.145] |
| Life satisfaction | 1.597 (.251)* | 1.612 (.252)* | 1.612 (.252)* | 1.597 (.251)* | 1.612 (.252)* | 1.612 (.252)* | 1.612 (.252)* |
| 95% CI | [1.105, 2.090] | [1.119, 2.105] | [1.119, 2.105] | [1.105, 2.090] | [1.119, 2.105] | [1.119, 2.105] | [1.119, 2.105] |
| *Residual Variances* |  |  |  |  |  |  |  |
| Reappraisal | .982 (.016)* | .982 (.016)* | .982 (.016)* | - | - | - | .982 (.016)* |
| 95% CI | [.951, 1.013] | [.951, 1.013] | [.951, 1.013] |  |  |  | [.951, 1.013] |
| Suppression | - | - | - | .965 (.022)* | .965 (.022)* | .965 (.022)* | .965 (.022)* |
| 95% CI |  |  |  | [.922, 1.008] | [.922, 1.008] | [.922, 1.008] | [.922, 1.008] |
| Positive affect | .814 (.042)* | .814 (.042)* | .863 (.038)* | .870 (.038)* | .870 (.038)* | .919 (.031)* | .758 (.045)* |
| 95% CI | [.731, .897] | [.731, .897] | [.788, .938] | [.797, .944] | [.797, .944] | [.857, .980] | [.671, .846] |
| Negative affect | .883 (.036)* | .883 (.036)* | .887 (.036)* | .983 (.015)* | .983 (.015)* | .991 (.011)* | .878 (.037)* |
| 95% CI | [.812, .954] | [.812, .954] | [.817, .957] | [.952, 1.013] | [.952, 1.013] | [.969, 1.010] | [.805, .950] |
| Life satisfaction | .571 (.045)* | .574 (.045)* | .574 (.045)* | .571 (.045)* | .574 (.045)* | .574 (.045)* | .574 (.045)* |
| 95% CI | [.483, .659] | [.485, .662] | [.485, .662] | [.483, .659] | [.485, .662] | [.485, .662] | [.485, .662] |
| *Goodness of fit* |  |  |  |  |  |  |  |
| CFI | 1.000 | 1.000 | .947 | 1.000 | 1.000 | .949 | 1.000 |
| TLI | 1.016 | 1.003 | .868 | 1.042 | 1.015 | .872 | 1.019 |
| RMSEA | .000 | .000 | .113 | .000 | .000 | .105 | .000 |
| SRMR | .007 | .013 | .064 | .000 | .011 | .066 | .011 |
| χ2fit | .561 n.s. | 1.857 n.s. | 18.141* | .0001 n.s. | 1.298 n.s. | 16.251* | 1.867 n.s. |
| χ2baseline | 278.265* | 278.265* | 278.265* | 249.862* | 249.862* | 249.862* | 307.746* |
| BIC | 3834.746 | 3830.418 | 3835.454 | 3992.069 | 3987.742 | 3991.447 | 4749.312 |
| -2LL test | I:IIa=1.269, ns; II:IIIa=16.284* | | | I:IIb=1.296, ns; II:IIIb=14.952* | | |  |
| N | 277 | 277 | 277 | 277 | 277 | 277 | 277 |

*Note.* Table entries are indirect and total effects of religiosity on life satisfaction, with bootstrapped standard errors in brackets (5000 bootstrap samples). * The 95% confidence interval of the effect based on 5,000 bootstrap samples does not include zero (as per the bias-corrected bootstrap approach).

Table A4

*Indirect effects and bootstrapped standard errors for the three-path mediation models – Israeli Jewish sample (Study 1)*

|  | Model Ia | Model IIa | Model IIIa | Model Ib | Model IIb | Model IIIb | Model IV |
| --- | --- | --- | --- | --- | --- | --- | --- |
| *Specific indirect effects* |  |  |  |  |  |  |  |
| Religiosity->PA-> Life satisfaction | .094 (.032)* | .096 (.033)* | - | .141 (.035)* | .141 (.035)* | - | .100 (.033)* |
| 95% CI | [.030, .157] | [.031, .162] |  | [.071, .204] | [.072, .210] |  | [.035, .166] |
| Religiosity -> Reappraisal -> Positive affect -> Life satisfaction | .040 (.013)* | .041 (.013)* | .046 (.014)* | - | - | - | .043 (.014)* |
| 95% CI | [.015, .066] | [.016, .067] | [.019, .074] |  |  |  | [.017, .070] |
| Religiosity -> Suppression -> Positive affect -> Life satisfaction | - | - | - | -.003 (.004) | -.003 (.004) | -.002 (.004) | -.006 (.005) |
| 95% CI |  |  |  | [-.011, .004] | [-.011, .004] | [-.009, .005] | [-.015, .003] |
| Religiosity -> Negative affect -> Life satisfaction | .006 (.006) | .005 (.006) | - | .009 (.007) | .009 (.007) | - | .007 (.006) |
| 95% CI | [-.007, .018] | [-.007, .018] |  | [-.005, .023] | [-.005, .023] |  | [-.006, .019] |
| Religiosity -> Reappraisal -> Negative affect -> Life satisfaction | .002 (.002) | .002 (.002) | .002 (.002) | - | - | - | .002 (.002) |
| 95% CI | [-.001, .005] | [-.001, .005] | [-.001, .005] |  |  |  | [-.001, .006] |
| Religiosity -> Suppression -> Negative affect -> Life satisfaction | - | - | - | -.001 (.001) | -.001 (.001) | -.001 (.001) | -.002 (.001) |
| 95% CI |  |  |  | [-.004, .001] | [-.004, .001] | [-.004, .001] | [-.004, .001] |
| *Sum of indirect effects (total indirect)* | .141(.036)* | .145 (.037)* | .048 (.015)* | .141 (.036)* | .145 (.037)* | -.003 (.004) | .145 (.037)* |
| 95% CI | [.071, .212] | [.073, .217] | [.019, .077] | [.071, .212] | [.073, .217] | [-.012, .005] | [.073, .217] |
| *Direct effect* *of religiosity* | .060 (.047) | - | - | .060 (.047) | - | - | - |
| 95% CI | [-.032, .152] |  |  | [-.032, .152] |  |  |  |
| *Total effect of religiosity* | .202( .057)* | .145 (.037)* | .048 (.015)* | .202 (.057)* | .145 (.037)* | -.003 (.004) | .145 (.037)* |
| 95% CI | [.091, .312] | [.073, .217] | [.019, .077] | [.091, .312] | [.073, .217] | [-.012, .005] | [.073, .217] |
| *Goodness of fit* |  |  |  |  |  |  |  |
| CFI | .999 | .997 | .973 | .995 | .992 | .928 | .994 |
| RMSEA | .023 | .037 | .080 | .066 | .058 | .121 | .043 |
| SRMR | .010 | .017 | .052 | .015 | .021 | .075 | .021 |
| χ2fit | 1.150, n.s. | 2.786, n.s. | 11.379* | 2.272, n.s. | 3.908, n.s. | 20.921* | 4.626, n.s. |
| BIC | 2898.975 | 2894.948 | 2892.216 | 3073.725 | 3069.698 | 3075.385 | 3870.625 |
| -2LL test | I:IIa=1.636, ns; II:IIIa=8.594* | | | I:IIb=1.636, ns; II:IIIb=17.014* | | |  |
| N | 288 | 288 | 288 | 288 | 288 | 288 | 288 |

*Note.* Table entries are indirect and total effects of religiosity on life satisfaction, with bootstrapped standard errors in brackets (5000 bootstrap samples). * The 95% confidence interval of the effect based on 5,000 bootstrap samples does not include zero (as per the bias-corrected bootstrap approach)

Table A5

*Indirect and total effects for the three-path mediation models – American Christian sample (Study 2)*

|  | Model Ia | Model IIa | Model IIIa | Model Ib | Model IIb | Model IIIb | Model IV |
| --- | --- | --- | --- | --- | --- | --- | --- |
| *Specific indirect effects* |  |  |  |  |  |  |  |
| Religiosity->PA-> Life satisfaction | .104 (.027)* | .107 (.028)* | - | .104 (.028)* | .107 (.029)* | - | .086 (.027)* |
| 95% CI | [.051, .157] | [.052, .162] |  | [.049, .159] | [.050, .164] |  | [.033, .138] |
| Religiosity -> Reappraisal -> Positive affect -> Life satisfaction | .021 (.001)* | .022 (.010)* | .024 (.011)* | - | - | - | .022 (.010)* |
| 95% CI | [.001, .041] | [.001, .042] | [.001, .046] |  |  |  | [.001, .042] |
| Religiosity -> Suppression -> Positive affect -> Life satisfaction | - | - | - | .021 (.009)* | .022 (.009)* | .026 (.010)* | .021 (.008)* |
| 95% CI |  |  |  | [.004, .038] | [.005, .039] | [.006, .045] | [.005, .038] |
| Religiosity -> Negative affect -> Life satisfaction | .018 (.017) | .018 (.017) | - | .027 (.018) | .027 (.018) | - | .014 (.017) |
| 95% CI | [-.015, .052] | [-.015, .052] |  | [-.009, .063] | [-.009, .063] |  | [-.019, .048] |
| Religiosity -> Reappraisal -> Negative affect -> Life satisfaction | .013 (.006)* | .013 (.006)* | .013 (.007)* | - | - | - | .013 (.006)* |
| 95% CI | [.000, .026] | [.000, .026] | [.000, .026] |  |  |  | [.000, .025] |
| Religiosity -> Suppression -> Negative affect -> Life satisfaction | - | - | - | .004 (.004) | .004 (.004) | .005 (.004) | .004 (.003) |
| 95% CI |  |  |  | [-.003, .011] | [-.003, .011] | [-.002, .013] | [-.003, .011] |
| *Sum of indirect effects (total indirect)* | .126 (.030)* | .160 (.039)* | .037 (.017)* | .156 (.038)* | .160 (.039)* | .031 (.012)* | .160 (.039)* |
| 95% CI | [.156, .038] | [.084, .236] | [.003, .070] | [.082, .231] | [.084, .236] | [.007, .062] | [.084, .236] |
| *Direct effect* *of religiosity* | .054 (.047) | - | - | .054 (.047) | - | - | - |
| 95% CI | [-.039, .146] |  |  | [-.039, .146] |  |  |  |
| *Total effect of religiosity* | .210 (.057)* | .160 (.039)* | .037 (.017)* | .210 (.057)* | .160 (.039)* | .031 (.012)* | .160 (.039)* |
| 95% CI | [.077, .258] | [.084, .236] | [.003, .070] | [.097, .323] | [.084, .236] | [.007, .062] | [.084, .236] |
| *Goodness of fit* |  |  |  |  |  |  |  |
| CFI | 1.000 | 1.000 | .947 | 1.000 | 1.000 | .949 | 1.000 |
| RMSEA | .000 | .000 | .113 | .000 | .000 | .105 | .000 |
| SRMR | .007 | .013 | .064 | .000 | .011 | .066 | .011 |
| χ2fit | .561 n.s. | 1.857 n.s. | 18.141* | .001 n.s. | 1.298 n.s. | 16.251* | 1.867 |
| BIC | 3834.746 | 3830.418 | 3835.454 | 3992.069 | 3987.742 | 3991.447 | 4749.312 |
| -2LL test | I:IIa=1.296, ns; II:IIIa=16.284* | | | I:IIb=1.296, ns; II:IIIb=14.952* | | |  |
| N | 277 | 277 | 277 | 277 | 277 | 277 | 277 |

*Note.* Table entries are indirect and total effects of religiosity on life satisfaction, with bootstrapped standard errors in brackets (5000 bootstrap samples). * The 95% confidence interval of the effect based on 5,000 bootstrap samples does not include zero (as per the bias-corrected bootstrap approach).
